# Supplementary material for: A Quantitative Analysis of the Need for High Conversion Efficiency PV Technologies in Carbon Mitigation Strategies
Source: MDPI journal article supplement (doi:10.3390/solar4020009), 2024-03-26
Supplement: s1 [file s1]

# A Quantitative Analysis of the Need for High Conversion Efficiency PV Technologies in Carbon Mitigation Strategy: Supplementary Material

Kenneth M. Hughes\* and Chris C. Phillips

The Blackett Laboratory, Department of Physics, Imperial College London, London SW7 2AZ, UK

## 1 Energy storage and its impact on *mPCEs* and land areas

If a *Contribution* of 15% and a roof pitch of  $39^\circ$  are assumed, the *mPCE* over the course of the year is found to be  $(61 \pm 13)\%$  using the IBEIS Energy Trends Monthly table for 2018 [1]. Assuming then that roof-mounted PV has a PCE of precisely 61%, it is clear that, while a 15% *Contribution* could be achieved over the course of the year, an excess of energy would be generated over the six summer months, and there would be a deficit over the six winter months, as shown in Table S1. This Table also shows the numbers found assuming a PCE of 23.8%; the overall *Contribution* for this PCE, given these consumption figures, is found to be  $(6 \pm 2)\%$ .

We researched the current market of batteries for residential energy storage [2–5], and found the highest energetic capacity per battery to be 13.5 kW h, achieved using lithium-ion technology [6]. The same battery also has the highest capacity per unit volume, at  $\sim 400 \text{ kW h m}^{-3}$ . Each of these batteries weighs 114 kg and takes up  $0.127 \text{ m}^3$  [6]. Using this battery as an example, we investigate the practicality of current storage technology. Looking first at daily storage, Table S1 shows that the maximum average daily energy excess for a 61% PCE is  $\sim 31 \text{ kW h}$  in July, which would require three of these batteries. Given that these batteries are quoted as being stackable up to ten units [6], this suggests that energy generated beyond the 15% *Contribution* level could be stored on a daily timescale. For a PCE of 23.8%, there is no average daily excess, so it can be assumed that any fluctuations around this could easily be stored in one battery.

However, if the 15% *Contribution* is to be maintained year-round, then all the excess energy generated during the summer months must be stored for use during the winter months. Looking on this seasonal timescale, a 61% PCE system would generate an additional  $\sim 970 \text{ kW h}$  in July alone, which would require 72 of these batteries to store. This would have a total weight and volume of batteries of  $>8000 \text{ kg}$  and

$>9 \text{ m}^3$  respectively [6]. The total summer excess generated by a system with a 61% PCE is  $\sim 3900 \text{ kW h}$ , corresponding to 292 batteries, weighing  $>33\,000 \text{ kg}$  and requiring  $\sim 37 \text{ m}^3$ .

A 61% PCE would allow for a true 15% *Contribution*, as long as the methods used to provide the other 85% are able to provide variable amounts of energy throughout the year. Only when *Contributions* approach 100% does excess energy generation become a serious problem that must be tackled with storage solutions to avoid losses. As shown in Table S1, the summer months can produce a *Contribution* of  $>15\%$  (up to 33% in July). This means that, even though the *Contribution* from the PV system may fall over winter to just 3%, a 15% *Contribution* over the year may be upheld if other energy sources can be used to provide up to 97% over winter, but need only produce  $\sim 70\%$  in July.



S1) shows that in this case, the values for the panels laid flat are:

$$A_F = N_F D, \quad (1)$$

$$M_F = N_F D, \quad (2)$$

$$I_F = N_F D \cos \varphi, \quad (3)$$

where  $\varphi$  is the latitude of the farm. We have set the length of the solar panel in the direction parallel with the equator to be 1, as it does not affect the results. For the solar panels being tilted at an angle  $\theta$ , the values are:

$$A_T = (N_T - 1)D \cdot \frac{\cos(\varphi - \theta)}{\cos \varphi} + D \cos \theta \quad (4)$$

$$M_T = N_T D \quad (5)$$

$$I_T = N_T D \cos(\varphi - \theta). \quad (6)$$

For the two cases to be equivalent in terms of energy generation, the insolation received by the panels of farm must be equal:

$$I_F = I_T \quad (7)$$

$$N_F D \cos \varphi = N_T D \cos(\varphi - \theta). \quad (8)$$

Hence,

$$N_T = N_F \cdot \frac{\cos \varphi}{\cos(\varphi - \theta)}. \quad (9)$$

This is an exact expression, however it is here that the condition  $N_{F,T} \in \mathbb{Z}$ ; requiring that the tilted panels receive *no less* insolation than the flat panels, this gives,

$$N_T = \left\lceil N_F \cdot \frac{\cos \varphi}{\cos(\varphi - \theta)} \right\rceil. \quad (10)$$

The area of material for the tilted panel case is then given by,

$$M_T = D \cdot \left\lceil N_F \cdot \frac{\cos \varphi}{\cos(\varphi - \theta)} \right\rceil. \quad (11)$$

The expression for the land area required is,

$$\left( \left\lceil N_F \cdot \frac{\cos \varphi}{\cos(\varphi - \theta)} \right\rceil - 1 \right) \cdot D \cdot \frac{\cos(\varphi - \theta)}{\cos \varphi} + D \cdot \cos \theta. \quad (12)$$

Table S2 gives maximal values for the fractional difference in land area,  $\frac{(A_T - A_F)}{A_F}$ , and Table S3 does similarly for the fractional difference in area of solar panel material needed,  $\frac{(M_T - M_F)}{M_F}$ . The values were calculated for all  $\theta \in [0, 90^\circ]$ , and for the range  $N_F \in \mathbb{Z} \in [250, 600]$ . This lower bound was chosen as an estimate of a lower bound for the number of rows solar panels that would be needed to create a solar farm of the areas involved in our calculations ( $\sim 1200 \text{ km}^2$ ). The upper bound was arbitrarily chosen as a larger number by which point the argument has been made.

We see from Table S2 that the fractional change in land area required is  $<1\%$  for all latitudes  $<69^\circ$ . Now, in 2011 it was true that 99% of the world's population lived within  $60^\circ$  of the equator [10]; based on this, it is safe to assume that any latitudes at which such a solar farm might be constructed will be within this range, and so the maximum fractional change in land area needed with panel inclination will be  $<1\%$ .

Notice also that every maximal fractional area change in Table S2 occurs for a panel incline that is far from the latitude, and at a number of rows  $<300$ , which is near the start of the range of  $N_F$  considered.

Since the optimal tilt angle for material purposes is at  $\theta = \varphi$ , and with the number of rows likely to be significantly greater than these values, the change in area with these parameters will be smaller still. We therefore believe the invariance of spatial efficiency used in the main paper is justified.

Indeed, the results of Table S3 show that the maximal fractional decrease in solar panel material needed always comes at  $\theta = \varphi$ , with a few values missing due to rounding errors. Table S3 also shows that the change in material area is very variable, unlike the land area needed. An important point to note is that for locations nearer the equator, that is at smaller latitudes, the maximum saving is much smaller than at higher latitudes. For the calculations in the main paper, we were looking at the UK, and London in particular, with a latitude of  $\sim 52^\circ$ ; it can be seen in Table S3 that the maximum fractional decrease in material is  $\sim 38\%$ , as was quoted in the main paper.

The main shortcoming of the data in Table S3 is that the range of  $N_F$  used went only as high as 600 rows. While this was not a problem in Table S2 – where the fractional change in land area generally decreased with increasing  $N_F$  – in this case the value of  $N_F$  at which the fractional change in material is maximised varies significantly across the whole range. As such, it may be the case that greater fractional savings would be possible at higher numbers of rows beyond 600.

| Latitude ( $^\circ$ ) | $N_F \geq 250$                  |       |                       | All $N_F$                       |       |                       |
|-----------------------|---------------------------------|-------|-----------------------|---------------------------------|-------|-----------------------|
|                       | Max. Fractional Area Change (%) | $N_F$ | $\theta$ ( $^\circ$ ) | Max. Fractional Area Change (%) | $N_F$ | $\theta$ ( $^\circ$ ) |
| 0                     | 0.38                            | 250   | 1                     | 99.97                           | 1     | 1                     |
| 1                     | 0.37                            | 262   | 11                    | 99.82                           | 1     | 3                     |
| 2                     | 0.38                            | 254   | 11                    | 99.54                           | 1     | 5                     |
| 3                     | 0.38                            | 250   | 9                     | 99.15                           | 1     | 7                     |
| 4                     | 0.38                            | 252   | 16                    | 98.63                           | 1     | 9                     |
| 5                     | 0.38                            | 262   | 5                     | 97.99                           | 1     | 11                    |
| 6                     | 0.36                            | 250   | 14                    | 97.24                           | 1     | 13                    |
| 7                     | 0.37                            | 255   | 17                    | 96.36                           | 1     | 15                    |
| 8                     | 0.36                            | 273   | 4                     | 95.37                           | 1     | 17                    |
| 9                     | 0.39                            | 256   | 7                     | 94.26                           | 1     | 19                    |
| 10                    | 0.39                            | 256   | 3                     | 93.04                           | 1     | 21                    |
| 11                    | 0.39                            | 250   | 7                     | 91.70                           | 1     | 23                    |
| 12                    | 0.38                            | 256   | 8                     | 90.24                           | 1     | 25                    |
| 13                    | 0.39                            | 258   | 1                     | 88.68                           | 1     | 27                    |
| 14                    | 0.38                            | 256   | 10                    | 87.01                           | 1     | 29                    |
| 15                    | 0.40                            | 250   | 4                     | 85.23                           | 1     | 31                    |
| 16                    | 0.39                            | 250   | 6                     | 83.35                           | 1     | 33                    |
| 17                    | 0.38                            | 251   | 8                     | 81.37                           | 1     | 35                    |
| 18                    | 0.39                            | 252   | 4                     | 79.28                           | 1     | 37                    |
| 19                    | 0.38                            | 250   | 9                     | 77.10                           | 1     | 39                    |
| 20                    | 0.40                            | 251   | 2                     | 74.82                           | 1     | 41                    |
| 21                    | 0.39                            | 252   | 4                     | 72.45                           | 1     | 43                    |
| 22                    | 0.38                            | 251   | 14                    | 69.99                           | 1     | 45                    |
| 23                    | 0.38                            | 255   | 8                     | 67.44                           | 1     | 47                    |
| 24                    | 0.39                            | 251   | 4                     | 64.81                           | 1     | 49                    |
| 25                    | 0.40                            | 252   | 1                     | 62.10                           | 1     | 51                    |
| 26                    | 0.39                            | 254   | 3                     | 59.32                           | 1     | 53                    |
| 27                    | 0.38                            | 256   | 5                     | 56.45                           | 1     | 55                    |
| 28                    | 0.39                            | 251   | 6                     | 53.52                           | 1     | 57                    |

| Latitude (°) | $N_F \geq 250$                     |       |              | All $N_F$                          |       |              |
|--------------|------------------------------------|-------|--------------|------------------------------------|-------|--------------|
|              | Max. Fractional<br>Area Change (%) | $N_F$ | $\theta$ (°) | Max. Fractional<br>Area Change (%) | $N_F$ | $\theta$ (°) |
| 29           | 0.38                               | 258   | 5            | 50.52                              | 1     | 59           |
| 30           | 0.38                               | 255   | 10           | 50.00                              | 1     | 60           |
| 31           | 0.40                               | 250   | 2            | 53.05                              | 1     | 62           |
| 32           | 0.39                               | 251   | 8            | 56.16                              | 1     | 64           |
| 33           | 0.39                               | 253   | 3            | 59.33                              | 1     | 66           |
| 34           | 0.39                               | 250   | 13           | 62.54                              | 1     | 68           |
| 35           | 0.40                               | 251   | 1            | 65.80                              | 1     | 70           |
| 36           | 0.39                               | 254   | 3            | 69.10                              | 1     | 72           |
| 37           | 0.39                               | 251   | 4            | 72.44                              | 1     | 74           |
| 38           | 0.39                               | 251   | 10           | 75.81                              | 1     | 76           |
| 39           | 0.39                               | 251   | 7            | 79.21                              | 1     | 78           |
| 40           | 0.40                               | 251   | 2            | 82.64                              | 1     | 80           |
| 41           | 0.39                               | 253   | 5            | 86.08                              | 1     | 82           |
| 42           | 0.39                               | 251   | 3            | 89.55                              | 1     | 84           |
| 43           | 0.40                               | 250   | 7            | 93.02                              | 1     | 86           |
| 44           | 0.39                               | 256   | 3            | 96.51                              | 1     | 88           |
| 45           | 0.39                               | 253   | 8            | 98.25                              | 1     | 89           |
| 46           | 0.40                               | 253   | 80           | 98.25                              | 1     | 89           |
| 47           | 0.41                               | 251   | 82           | 98.25                              | 1     | 89           |
| 48           | 0.44                               | 253   | 88           | 98.25                              | 1     | 89           |
| 49           | 0.44                               | 251   | 87           | 98.25                              | 1     | 89           |
| 50           | 0.46                               | 258   | 86           | 98.25                              | 1     | 89           |
| 51           | 0.49                               | 250   | 88           | 98.25                              | 1     | 89           |
| 52           | 0.50                               | 252   | 83           | 98.25                              | 1     | 89           |
| 53           | 0.52                               | 250   | 89           | 98.25                              | 1     | 89           |
| 54           | 0.53                               | 251   | 86           | 98.25                              | 1     | 89           |
| 55           | 0.56                               | 250   | 88           | 98.25                              | 1     | 89           |
| 56           | 0.57                               | 251   | 84           | 98.25                              | 1     | 89           |
| 57           | 0.60                               | 256   | 87           | 98.25                              | 1     | 89           |
| 58           | 0.63                               | 251   | 84           | 98.25                              | 1     | 89           |
| 59           | 0.66                               | 252   | 87           | 98.25                              | 1     | 89           |
| 60           | 0.67                               | 253   | 87           | 98.25                              | 1     | 89           |
| 61           | 0.70                               | 250   | 81           | 98.25                              | 1     | 89           |
| 62           | 0.74                               | 251   | 86           | 98.25                              | 1     | 89           |
| 63           | 0.77                               | 252   | 82           | 98.25                              | 1     | 89           |
| 64           | 0.79                               | 256   | 82           | 99.13                              | 2     | 89           |
| 65           | 0.83                               | 257   | 88           | 99.13                              | 2     | 89           |
| 66           | 0.87                               | 253   | 88           | 99.13                              | 2     | 89           |
| 67           | 0.91                               | 258   | 85           | 99.13                              | 2     | 89           |
| 68           | 0.95                               | 254   | 84           | 99.13                              | 2     | 89           |
| 69           | 1.02                               | 252   | 80           | 99.13                              | 2     | 89           |
| 70           | 1.07                               | 253   | 88           | 99.13                              | 2     | 89           |
| 71           | 1.12                               | 251   | 81           | 99.13                              | 2     | 89           |
| 72           | 1.20                               | 250   | 87           | 99.42                              | 3     | 89           |
| 73           | 1.27                               | 251   | 88           | 99.42                              | 3     | 89           |
| 74           | 1.35                               | 250   | 84           | 99.42                              | 3     | 89           |

| Latitude (°) | $N_F \geq 250$                     |       |              | All $N_F$                          |       |              |
|--------------|------------------------------------|-------|--------------|------------------------------------|-------|--------------|
|              | Max. Fractional<br>Area Change (%) | $N_F$ | $\theta$ (°) | Max. Fractional<br>Area Change (%) | $N_F$ | $\theta$ (°) |
| 75           | 1.43                               | 254   | 80           | 99.42                              | 3     | 89           |
| 76           | 1.53                               | 253   | 85           | 99.56                              | 4     | 89           |
| 77           | 1.71                               | 252   | 83           | 99.56                              | 4     | 89           |
| 78           | 1.86                               | 251   | 88           | 99.56                              | 4     | 89           |
| 79           | 1.98                               | 250   | 85           | 99.65                              | 5     | 89           |
| 80           | 2.21                               | 253   | 83           | 99.65                              | 5     | 89           |
| 81           | 2.44                               | 255   | 85           | 99.71                              | 6     | 89           |
| 82           | 2.80                               | 250   | 88           | 99.75                              | 7     | 89           |
| 83           | 3.19                               | 254   | 86           | 99.78                              | 8     | 89           |
| 84           | 3.62                               | 258   | 86           | 99.81                              | 9     | 89           |
| 85           | 4.50                               | 252   | 88           | 99.84                              | 11    | 89           |
| 86           | 5.53                               | 258   | 87           | 99.88                              | 14    | 89           |
| 87           | 7.07                               | 266   | 81           | 99.91                              | 19    | 89           |
| 88           | 10.98                              | 257   | 84           | 99.94                              | 28    | 89           |
| 89           | 19.95                              | 286   | 86           | 99.97                              | 57    | 89           |
| 90           | 100.00                             | 1     | 4            | 100.00                             | 1     | 4            |

**Table S2:** A summary of the maximal fractional change in land area required for a solar farm when tilting the panels rather than having them laid flat. The third and fourth columns show the values of  $N_F$  (number of rows of panels) and  $\theta$  (angle of panels to the horizontal) respectively at which these maxima occur. We have only looked at  $N_F \geq 250$ , as we know a large number of rows will be needed for the areas in question.

| Latitude<br>(°) | $N_F \geq 250$                  |       |              |                                 |       |              | All $N_F$                       |       |              |                                 |       |              |
|-----------------|---------------------------------|-------|--------------|---------------------------------|-------|--------------|---------------------------------|-------|--------------|---------------------------------|-------|--------------|
|                 | Max. Fractional<br>Increase (%) | $N_F$ | $\theta$ (°) | Max. Fractional<br>Decrease (%) | $N_F$ | $\theta$ (°) | Max. Fractional<br>Increase (%) | $N_F$ | $\theta$ (°) | Max. Fractional<br>Decrease (%) | $N_F$ | $\theta$ (°) |
| 0               | 5630.23                         | 258   | 89           | 0.00                            | 250   | 0            | 5700.00                         | 1     | 89           | 0.00                            | 1     | 0            |
| 1               | 2765.30                         | 268   | 89           | 0.00                            | 250   | 0            | 2800.00                         | 1     | 89           | 0.00                            | 1     | 0            |
| 2               | 1809.96                         | 251   | 89           | 0.00                            | 250   | 0            | 1900.00                         | 1     | 89           | 0.00                            | 1     | 0            |
| 3               | 1331.95                         | 266   | 89           | 0.00                            | 250   | 0            | 1400.00                         | 1     | 89           | 0.00                            | 1     | 0            |
| 4               | 1044.96                         | 258   | 89           | 0.24                            | 411   | 4            | 1100.00                         | 1     | 89           | 0.24                            | 411   | 4            |
| 5               | 853.41                          | 264   | 89           | 0.38                            | 263   | 5            | 900.00                          | 1     | 89           | 0.38                            | 263   | 5            |
| 6               | 716.42                          | 268   | 89           | 0.55                            | 548   | 6            | 800.00                          | 1     | 89           | 0.55                            | 548   | 6            |
| 7               | 613.55                          | 251   | 89           | 0.74                            | 537   | 7            | 700.00                          | 1     | 89           | 0.74                            | 537   | 7            |
| 8               | 533.33                          | 252   | 89           | 0.97                            | 514   | 8            | 600.00                          | 1     | 89           | 0.97                            | 514   | 8            |
| 9               | 469.17                          | 253   | 89           | 1.23                            | 325   | 9            | 500.00                          | 1     | 88           | 1.23                            | 325   | 9            |
| 10              | 416.48                          | 273   | 89           | 1.52                            | 395   | 10           | 500.00                          | 1     | 89           | 1.52                            | 395   | 10           |
| 11              | 372.51                          | 251   | 89           | 1.84                            | 381   | 11           | 400.00                          | 1     | 87           | 1.84                            | 381   | 11           |
| 12              | 335.20                          | 250   | 89           | 2.18                            | 595   | 12           | 400.00                          | 1     | 88           | 2.18                            | 595   | 12           |
| 13              | 303.15                          | 254   | 89           | 2.56                            | 586   | 13           | 400.00                          | 1     | 89           | 2.56                            | 586   | 13           |
| 14              | 275.20                          | 250   | 89           | 2.97                            | 303   | 14           | 300.00                          | 1     | 86           | 2.97                            | 101   | 14           |
| 15              | 250.80                          | 250   | 89           | 3.41                            | 587   | 15           | 300.00                          | 1     | 87           | 3.41                            | 587   | 15           |
| 16              | 229.14                          | 278   | 89           | 3.87                            | 284   | 16           | 300.00                          | 1     | 88           | 3.87                            | 284   | 16           |
| 17              | 209.84                          | 254   | 89           | 4.37                            | 412   | 17           | 300.00                          | 1     | 89           | 4.37                            | 206   | 17           |
| 18              | 192.49                          | 253   | 89           | 4.89                            | 470   | 18           | 200.00                          | 1     | 80           | 4.89                            | 470   | 18           |
| 19              | 176.83                          | 259   | 89           | 5.45                            | 257   | 19           | 200.00                          | 1     | 81           | 5.45                            | 257   | 19           |
| 20              | 162.60                          | 254   | 89           | 6.03                            | 398   | 20           | 200.00                          | 1     | 82           | 6.03                            | 199   | 20           |
| 21              | 149.61                          | 254   | 89           | 6.64                            | 527   | 21           | 200.00                          | 1     | 84           | 6.64                            | 527   | 21           |
| 22              | 137.65                          | 255   | 89           | 7.28                            | 412   | 22           | 200.00                          | 1     | 85           | 7.28                            | 206   | 22           |
| 23              | 126.69                          | 251   | 89           | 7.95                            | 390   | 23           | 200.00                          | 1     | 86           | 7.95                            | 390   | 23           |
| 24              | 116.54                          | 260   | 89           | 8.64                            | 428   | 24           | 200.00                          | 1     | 87           | 8.64                            | 428   | 24           |
| 25              | 107.12                          | 267   | 89           | 9.37                            | 523   | 25           | 200.00                          | 1     | 89           | 9.37                            | 523   | 25           |
| 26              | 98.31                           | 296   | 89           | 10.12                           | 415   | 26           | 100.00                          | 1     | 53           | 10.12                           | 415   | 26           |
| 27              | 90.16                           | 254   | 89           | 10.90                           | 367   | 27           | 100.00                          | 1     | 55           | 10.90                           | 367   | 27           |
| 28              | 82.49                           | 257   | 89           | 11.70                           | 393   | 28           | 100.00                          | 1     | 57           | 11.70                           | 393   | 28           |

| Latitude<br>(°) | $N_F \geq 250$                  |       |              |                                 |       |              | All $N_F$                       |       |              |                                 |       |              |
|-----------------|---------------------------------|-------|--------------|---------------------------------|-------|--------------|---------------------------------|-------|--------------|---------------------------------|-------|--------------|
|                 | Max. Fractional<br>Increase (%) | $N_F$ | $\theta$ (°) | Max. Fractional<br>Decrease (%) | $N_F$ | $\theta$ (°) | Max. Fractional<br>Increase (%) | $N_F$ | $\theta$ (°) | Max. Fractional<br>Decrease (%) | $N_F$ | $\theta$ (°) |
| 29              | 75.30                           | 251   | 89           | 12.54                           | 335   | 29           | 100.00                          | 1     | 59           | 12.54                           | 335   | 29           |
| 30              | 68.53                           | 251   | 89           | 13.40                           | 418   | 30           | 100.00                          | 1     | 61           | 13.40                           | 209   | 30           |
| 31              | 62.15                           | 251   | 89           | 14.26                           | 596   | 30           | 100.00                          | 1     | 63           | 14.26                           | 596   | 30           |
| 32              | 56.08                           | 255   | 89           | 15.20                           | 487   | 32           | 100.00                          | 1     | 65           | 15.20                           | 487   | 32           |
| 33              | 50.20                           | 251   | 89           | 16.13                           | 279   | 33           | 100.00                          | 1     | 67           | 16.13                           | 31    | 33           |
| 34              | 44.92                           | 256   | 89           | 17.10                           | 427   | 34           | 100.00                          | 1     | 69           | 17.10                           | 427   | 34           |
| 35              | 39.72                           | 282   | 89           | 18.08                           | 553   | 35           | 100.00                          | 1     | 71           | 18.08                           | 553   | 35           |
| 36              | 34.80                           | 250   | 89           | 19.10                           | 377   | 36           | 100.00                          | 1     | 73           | 19.10                           | 377   | 36           |
| 37              | 30.08                           | 256   | 89           | 20.14                           | 442   | 37           | 100.00                          | 1     | 75           | 20.14                           | 442   | 37           |
| 38              | 25.60                           | 250   | 89           | 21.20                           | 434   | 38           | 100.00                          | 1     | 77           | 21.20                           | 217   | 38           |
| 39              | 21.27                           | 268   | 89           | 22.28                           | 534   | 39           | 100.00                          | 1     | 79           | 22.28                           | 534   | 39           |
| 40              | 17.13                           | 251   | 89           | 23.40                           | 483   | 40           | 100.00                          | 1     | 81           | 23.40                           | 483   | 40           |
| 41              | 13.16                           | 266   | 89           | 24.53                           | 265   | 41           | 100.00                          | 1     | 83           | 24.53                           | 53    | 41           |
| 42              | 9.34                            | 257   | 89           | 25.68                           | 292   | 42           | 100.00                          | 1     | 85           | 25.68                           | 292   | 42           |
| 43              | 5.64                            | 266   | 89           | 26.86                           | 577   | 43           | 100.00                          | 1     | 87           | 26.86                           | 577   | 43           |
| 44              | 2.07                            | 290   | 89           | 28.07                           | 367   | 44           | 100.00                          | 1     | 89           | 28.07                           | 367   | 44           |
| 45              | 0.00                            | 250   | 0            | 29.29                           | 478   | 45           | 0.00                            | 1     | 0            | 29.29                           | 239   | 45           |
| 46              | 0.00                            | 250   | 0            | 30.53                           | 488   | 46           | 0.00                            | 1     | 0            | 30.53                           | 488   | 46           |
| 47              | 0.00                            | 250   | 0            | 31.80                           | 500   | 47           | 0.00                            | 1     | 0            | 31.80                           | 500   | 47           |
| 48              | 0.00                            | 250   | 0            | 33.09                           | 541   | 48           | 0.00                            | 1     | 0            | 33.09                           | 541   | 48           |
| 49              | 0.00                            | 250   | 0            | 34.39                           | 503   | 49           | 0.00                            | 1     | 0            | 34.39                           | 503   | 49           |
| 50              | 0.00                            | 250   | 0            | 35.71                           | 252   | 50           | 0.00                            | 1     | 0            | 35.71                           | 14    | 50           |
| 51              | 0.00                            | 250   | 0            | 37.07                           | 491   | 51           | 0.00                            | 1     | 0            | 37.07                           | 491   | 51           |
| 52              | 0.00                            | 250   | 0            | 38.43                           | 549   | 52           | 0.00                            | 1     | 0            | 38.43                           | 549   | 52           |
| 53              | 0.00                            | 250   | 0            | 39.82                           | 550   | 53           | 0.00                            | 1     | 0            | 39.82                           | 550   | 53           |
| 54              | 0.00                            | 250   | 0            | 41.22                           | 262   | 54           | 0.00                            | 1     | 0            | 41.22                           | 131   | 54           |
| 55              | 0.00                            | 250   | 0            | 42.64                           | 598   | 55           | 0.00                            | 1     | 0            | 42.64                           | 598   | 55           |
| 56              | 0.00                            | 250   | 0            | 44.08                           | 397   | 56           | 0.00                            | 1     | 0            | 44.08                           | 397   | 56           |
| 57              | 0.00                            | 250   | 0            | 45.54                           | 336   | 57           | 0.00                            | 1     | 0            | 45.54                           | 112   | 57           |



| Latitude<br>( $^{\circ}$ ) | $N_F \geq 250$                  |       |                         |                                 |       |                         | All $N_F$                       |       |                         |                                 |       |                         |
|----------------------------|---------------------------------|-------|-------------------------|---------------------------------|-------|-------------------------|---------------------------------|-------|-------------------------|---------------------------------|-------|-------------------------|
|                            | Max. Fractional<br>Increase (%) | $N_F$ | $\theta$ ( $^{\circ}$ ) | Max. Fractional<br>Decrease (%) | $N_F$ | $\theta$ ( $^{\circ}$ ) | Max. Fractional<br>Increase (%) | $N_F$ | $\theta$ ( $^{\circ}$ ) | Max. Fractional<br>Decrease (%) | $N_F$ | $\theta$ ( $^{\circ}$ ) |
| 58                         | 0.00                            | 250   | 0                       | 47.01                           | 568   | 58                      | 0.00                            | 1     | 0                       | 47.01                           | 568   | 58                      |
| 59                         | 0.00                            | 250   | 0                       | 48.50                           | 565   | 59                      | 0.00                            | 1     | 0                       | 48.50                           | 565   | 59                      |
| 60                         | 0.00                            | 250   | 0                       | 50.00                           | 250   | 60                      | 0.00                            | 1     | 0                       | 50.00                           | 2     | 60                      |
| 61                         | 0.00                            | 250   | 0                       | 51.52                           | 264   | 61                      | 0.00                            | 1     | 0                       | 51.52                           | 33    | 61                      |
| 62                         | 0.00                            | 250   | 0                       | 53.05                           | 475   | 62                      | 0.00                            | 1     | 0                       | 53.05                           | 475   | 62                      |
| 63                         | 0.00                            | 250   | 0                       | 54.60                           | 500   | 63                      | 0.00                            | 1     | 0                       | 54.60                           | 500   | 63                      |
| 64                         | 0.00                            | 250   | 0                       | 56.16                           | 568   | 64                      | 0.00                            | 1     | 0                       | 56.16                           | 568   | 64                      |
| 65                         | 0.00                            | 250   | 0                       | 57.74                           | 336   | 65                      | 0.00                            | 1     | 0                       | 57.74                           | 168   | 65                      |
| 66                         | 0.00                            | 250   | 0                       | 59.33                           | 445   | 66                      | 0.00                            | 1     | 0                       | 59.33                           | 445   | 66                      |
| 67                         | 0.00                            | 250   | 0                       | 60.93                           | 540   | 67                      | 0.00                            | 1     | 0                       | 60.93                           | 540   | 67                      |
| 68                         | 0.00                            | 250   | 0                       | 62.54                           | 323   | 68                      | 0.00                            | 1     | 0                       | 62.54                           | 323   | 68                      |
| 69                         | 0.00                            | 250   | 0                       | 64.16                           | 466   | 69                      | 0.00                            | 1     | 0                       | 64.16                           | 466   | 69                      |
| 70                         | 0.00                            | 250   | 0                       | 65.80                           | 345   | 70                      | 0.00                            | 1     | 0                       | 65.80                           | 345   | 70                      |
| 71                         | 0.00                            | 250   | 0                       | 67.44                           | 258   | 71                      | 0.00                            | 1     | 0                       | 67.44                           | 43    | 71                      |
| 72                         | 0.00                            | 250   | 0                       | 69.10                           | 521   | 72                      | 0.00                            | 1     | 0                       | 69.10                           | 521   | 72                      |
| 73                         | 0.00                            | 250   | 0                       | 70.76                           | 472   | 73                      | 0.00                            | 1     | 0                       | 70.76                           | 236   | 73                      |
| 74                         | 0.00                            | 250   | 0                       | 72.44                           | 312   | 74                      | 0.00                            | 1     | 0                       | 72.44                           | 156   | 74                      |
| 75                         | 0.00                            | 250   | 0                       | 74.12                           | 255   | 75                      | 0.00                            | 1     | 0                       | 74.12                           | 85    | 75                      |
| 76                         | 0.00                            | 250   | 0                       | 75.81                           | 310   | 76                      | 0.00                            | 1     | 0                       | 75.81                           | 62    | 76                      |
| 77                         | 0.00                            | 250   | 0                       | 77.50                           | 529   | 77                      | 0.00                            | 1     | 0                       | 77.50                           | 529   | 77                      |
| 78                         | 0.00                            | 250   | 0                       | 79.21                           | 303   | 78                      | 0.00                            | 1     | 0                       | 79.21                           | 101   | 78                      |
| 79                         | 0.00                            | 250   | 0                       | 80.92                           | 283   | 79                      | 0.00                            | 1     | 0                       | 80.92                           | 283   | 79                      |
| 80                         | 0.00                            | 250   | 0                       | 82.63                           | 334   | 80                      | 0.00                            | 1     | 0                       | 82.63                           | 167   | 80                      |
| 81                         | 0.00                            | 250   | 0                       | 84.36                           | 505   | 81                      | 0.00                            | 1     | 0                       | 84.36                           | 505   | 81                      |
| 82                         | 0.00                            | 250   | 0                       | 86.08                           | 388   | 82                      | 0.00                            | 1     | 0                       | 86.08                           | 194   | 82                      |
| 83                         | 0.00                            | 250   | 0                       | 87.81                           | 599   | 83                      | 0.00                            | 1     | 0                       | 87.81                           | 599   | 83                      |
| 84                         | 0.00                            | 250   | 0                       | 89.55                           | 287   | 84                      | 0.00                            | 1     | 0                       | 89.55                           | 287   | 84                      |
| 85                         | 0.00                            | 250   | 0                       | 91.28                           | 436   | 85                      | 0.00                            | 1     | 0                       | 91.28                           | 218   | 85                      |
| 86                         | 0.00                            | 250   | 0                       | 93.02                           | 258   | 85                      | 0.00                            | 1     | 0                       | 93.02                           | 43    | 85                      |

| Latitude<br>( $^{\circ}$ ) | $N_F \geq 250$                  |       |                         |                                 |       |                         | All $N_F$                       |       |                         |                                 |       |                         |
|----------------------------|---------------------------------|-------|-------------------------|---------------------------------|-------|-------------------------|---------------------------------|-------|-------------------------|---------------------------------|-------|-------------------------|
|                            | Max. Fractional<br>Increase (%) | $N_F$ | $\theta$ ( $^{\circ}$ ) | Max. Fractional<br>Decrease (%) | $N_F$ | $\theta$ ( $^{\circ}$ ) | Max. Fractional<br>Increase (%) | $N_F$ | $\theta$ ( $^{\circ}$ ) | Max. Fractional<br>Decrease (%) | $N_F$ | $\theta$ ( $^{\circ}$ ) |
| 87                         | 0.00                            | 250   | 0                       | 94.77                           | 535   | 87                      | 0.00                            | 1     | 0                       | 94.77                           | 535   | 87                      |
| 88                         | 0.00                            | 250   | 0                       | 96.51                           | 573   | 88                      | 0.00                            | 1     | 0                       | 96.51                           | 573   | 88                      |
| 89                         | 0.00                            | 250   | 0                       | 98.25                           | 401   | 88                      | 0.00                            | 1     | 0                       | 98.25                           | 401   | 88                      |
| 90                         | 0.00                            | 250   | 0                       | 99.83                           | 600   | 1                       | 0.00                            | 1     | 0                       | 99.83                           | 600   | 1                       |

**Table S3:** A summary of the maximal fractional changes in area of solar panel material needed when going from panels laid flat to inclining them at an angle  $\theta$  to the horizontal. Values for increased and decreased areas of material have been included separately. The values of  $N^F$  (the number of rows when laid flat) and of  $\theta$  at which these extrema occur have been included. Only values for  $N^F \geq 250$  have been used due to the high number of rows that will be needed for the areas involved.

## References

- [1] Department for Business, Energy & Industrial Strategy. *Energy Trends: September 2019 – Inland energy consumption: primary fuel input basis (ET 1.2 – monthly)*. <https://webarchive.nationalarchives.gov.uk/20190509005513/https://www.gov.uk/government/statistics/total-energy-section-1-energy-trends>. Accessed: 2024-01-12. Apr. 2019.
- [2] Naked Solar. *Solar Batteries & Storage*. <https://naked solar.co.uk/storage/>. Accessed: 2024-01-12. 2020.
- [3] Solar Guide. *Solar Energy Storage: The Best Solar Batteries*. <http://solarguide.co.uk/solar-batteries#/>. Accessed: 2024-01-12. Mar. 2020.
- [4] Which?. *Solar panel battery storage*. <https://www.which.co.uk/reviews/solar-panels/article/solar-panels/solar-panel-battery-storage>. Accessed: 2024-01-12. Aug. 2023.
- [5] GreenMatch. *How Much Does a Solar Battery Storage System Cost (And Is It Worth It?)* <https://www.greenmatch.co.uk/blog/2018/07/solar-battery-storage-system-cost>. Accessed: 2024-01-12. Dec. 2023.
- [6] Tesla. *Powerwall*. [https://www.tesla.com/en\\_GB/powerwall](https://www.tesla.com/en_GB/powerwall). Accessed: 2024-01-12. 2024.
- [7] Pei Zhang et al. “Influence of practical complications on energy efficiency of the vehicle’s lithium-ion batteries”. In: *2011 International Conference on Electric Information and Control Engineering*. 2011, pp. 2278–2281.
- [8] Ali Eftekhari. “Energy efficiency: a critically important but neglected factor in battery research”. In: *Sustainable Energy Fuels* 1 (10 2017), pp. 2053–2060. DOI: 10.1039/C7SE00350A. URL: <http://dx.doi.org/10.1039/C7SE00350A>.
- [9] Matthias Vetter and Stephan Lux. “Chapter 11 – Rechargeable Batteries with Special Reference to Lithium-Ion Batteries”. In: *Storing Energy*. Ed. by Trevor M. Letcher. Oxford: Elsevier, 2016, pp. 205–225. ISBN: 978-0-12-803440-8. DOI: <https://doi.org/10.1016/B978-0-12-803440-8.00011-7>. URL: <http://www.sciencedirect.com/science/article/pii/B9780128034408000117>.
- [10] Matti Kummu and Olli Varis. “The world by latitudes: A global analysis of human population, development level and environment across the north-south axis over the past half century”. In: *Applied Geography* 31.2 (2011), pp. 495–507. ISSN: 0143-6228. DOI: <https://doi.org/10.1016/j.apgeog.2010.10.009>. URL: <http://www.sciencedirect.com/science/article/pii/S0143622810001244>.
